# Supplementary material
Source: PubMed Central journal article supplement (PMC3162457)
Supplement: supp_M111.254797_FigS3.pdf [file supp_M111.254797_FigS3.pdf]

Supplemental Figure S3

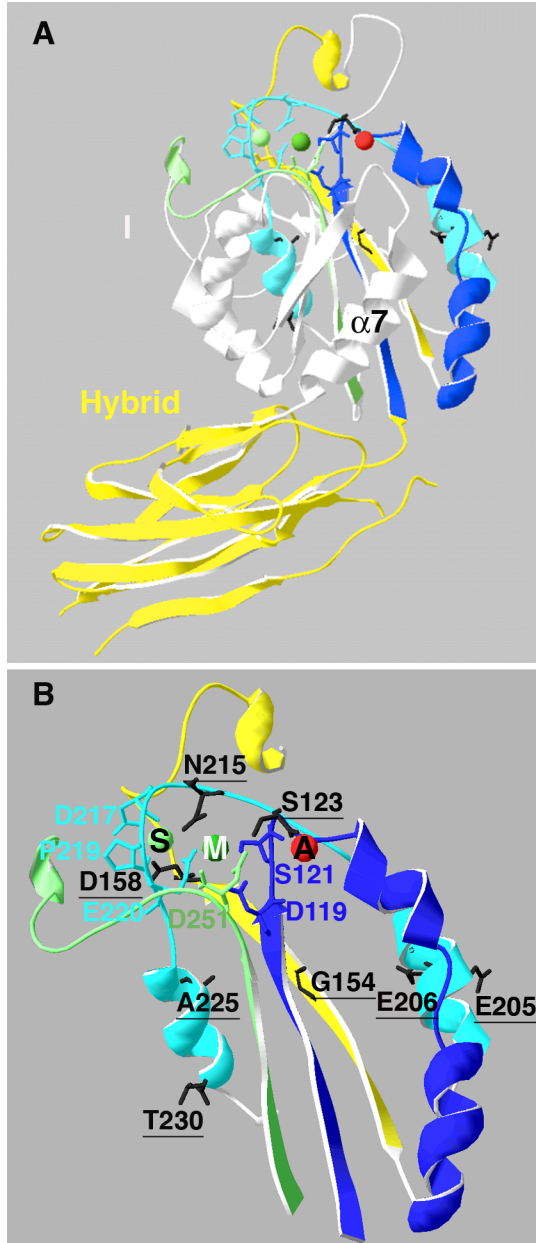

**Fig. S3.** Mutations reducing ligand binding map to MIDAS and SyMBS domains. *A.* Ribbon structure [from (28)] illustrating the location of the I and Hybrid (yellow) domains. Loops with residues that contribute to SyMBS, and MIDAS domains and the helices and  $\beta$ -strands flanking them are colored as are metal coordinating side chains. *B.* Enlarged MIDAS and SyMBS loops.  $\beta$ 1-loop- $\alpha$ 1,1' containing the MIDAS DXSXS (119-123) is in dark blue.  $\beta$ 4-loop- $\beta$ 10 helix containing MIDAS D251 is green. SyMBS coordinating N215, D217, P219, and E220 (also a MIDAS residue) are between  $\alpha$ 2 and  $\alpha$ 3 (light blue). The loop following  $\beta$ 2 contributes SyMBS D158 (yellow). Amino acids corresponding to those mutated in *Drosophila*  $\beta$ PS and analyzed for ligand binding are labeled (black and underlined). E205 corresponds to the position of amino acids (following N204) that are inserted in *mys*<sup>b69</sup> and *mys*<sup>b50</sup>. Coloring of divalent cations is; SyMBS (S) Ca<sup>2+</sup>, light green; MIDAS (M) Mg<sup>2+</sup>, green; and ADMIDAS (A) Ca<sup>2+</sup>, red.
