# Supplementary material
Source: PubMed Central journal article supplement (PMC3162457)
Supplement: supp_M111.254797_FigS4.pdf [file supp_M111.254797_FigS4.pdf]

Supplemental Figure S4

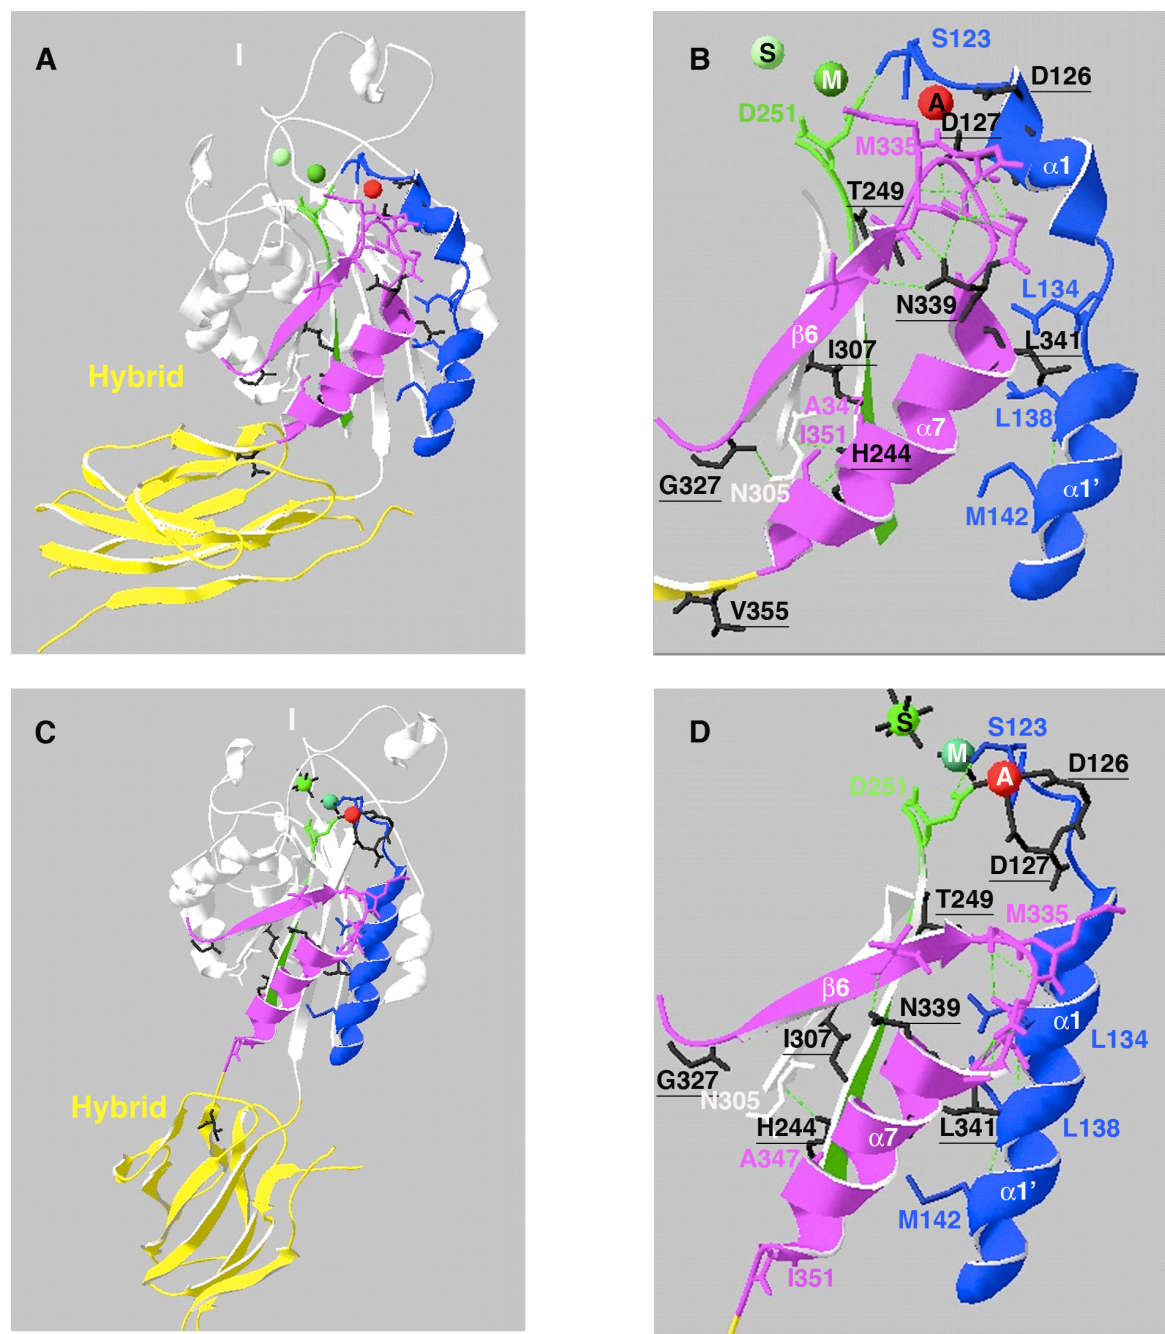

Fig. S4. Mutations that disrupt ADMIDAS increase ligand binding. *A* & *C*. Ribbon structure [from (28,30)] depicting the I and Hybrid (yellow) domains in the closed (*A*) and open (*C*) conformations. Loops with ADMIDAS coordinating residues are colored [loop- $\alpha 1,1'$  (blue),  $\beta 6$ -loop- $\alpha 7$  (magenta), and  $\beta 4$ -loop (green)] and expanded in *B* (closed) and *D* (open). Amino acids corresponding to those mutated in *Drosophila*  $\beta$ PS and analyzed for ligand binding are labeled (black and underlined). **D126**, **D127**, **M335**, and **D251** are ADMIDAS coordinating residues whose position relative to the ADMIDAS  $\text{Ca}^{2+}$  (A, red) are changed in the transition to the open state. The other divalent cations are SyMBBS  $\text{Ca}^{2+}$  (S, light green), and MIDAS  $\text{Mg}^{2+}$  (M, green). Hydrogen bonds are shown as green dashed lines in *B* and *D*.
