# Supplementary material
Source: PubMed Central journal article supplement (PMC3162457)
Supplement: supp_M111.254797_FigS6.pdf [file supp_M111.254797_FigS6.pdf]

Supplemental Figure S6

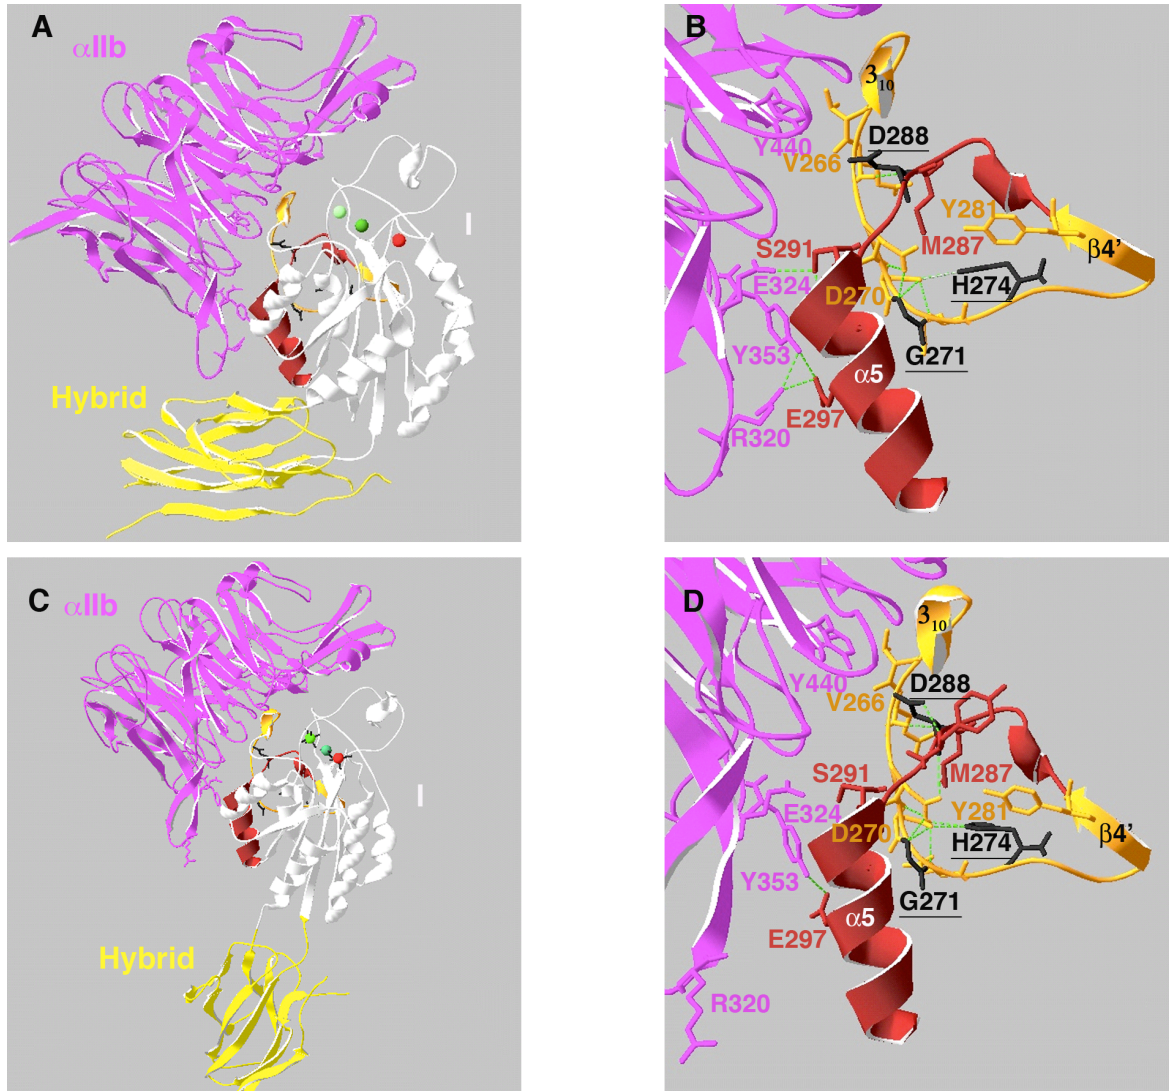

**Fig. S6.** Mutations that disrupt  $\alpha/\beta$  interactions in the closed conformation increase ligand binding. *A* and *C*. Ribbon structure [from (28,30)] depicting the  $\beta 3$  integrin I (white) and Hybrid (yellow) domains and the  $\alpha$ IIb head domain (magenta) in the closed (*A*) and open (*C*) conformations.  $3_{10}$ -loop- $\beta 4'$  (orange) and loop- $\alpha 5$  (dark red) are highlighted and expanded in *B* (closed) and *D* (open). Amino acids corresponding to those mutated in *Drosophila*  $\beta$ PS and analyzed for ligand binding are labeled (black and underlined). Cations are SyMBS  $\text{Ca}^{2+}$  (light green), MIDAS  $\text{Mg}^{2+}$  (green) and ADMIDAS  $\text{Ca}^{2+}$  (red). Hydrogen bonds are shown as green dashed lines in *B* and *D*.
