# Supplementary material
Source: PubMed Central journal article supplement (PMC3162457)
Supplement: supp_M111.254797_FigS9.pdf [file supp_M111.254797_FigS9.pdf]

## Supplemental Figure S9

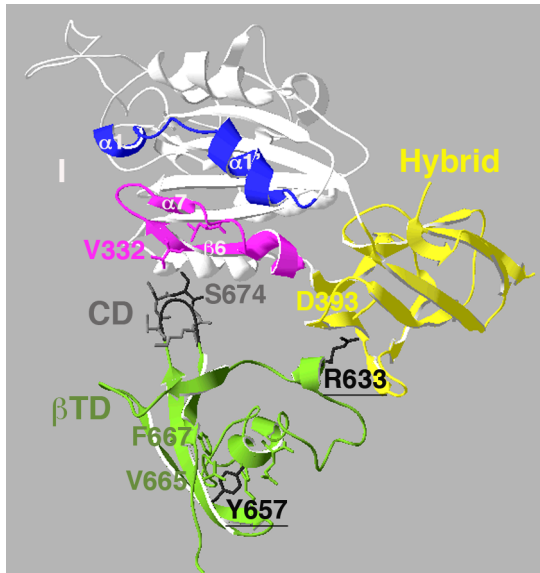

Fig. S9.  $\beta$ TD residues of  $\beta 3$  in the closed conformation. The ribbon structure [from (29)] suggesting the “deadbolt” hypothesis (31) where the CD loop (gray) of the  $\beta$ TD domain (green), specifically **S674**, is located within 2.8 Å of **V332** of the  $\beta 6$  strand. The  $\beta 6$ - $\alpha 7$  (magenta) and  $\alpha 1,1'$  (blue) of the  $\beta 3$  integrin I domain (white) are highlighted as is the Hybrid domain (yellow). Residues mutated in the genetic screen *mys*<sup>b29</sup> (F743>I;**Y657**) or in testing of the deadbolt hypothesis, **R633**, are labeled (underlined and in black). D393 in the Hybrid domain and within 3.5 Å of R633 is also shown. The side chains of CD loop residues deleted in testing deadbolt hypothesis are shown in gray but not labeled. The side chains of residues in the  $\beta$  strand prior to the CD loop and within 3.9 Å of **Y657** (**V665** and **F667**) are labeled.
