# Supplementary material
Source: PubMed Central journal article supplement (PMC3162457)
Supplement: supp_M111.254797_jbc.M111.254797-1.pdf [file supp_M111.254797_jbc.M111.254797-1.pdf]

Supplemental Table S1

| Table S1. Relative Expression Levels of PS2 Integrin Mutants |                    |      |                       |      |                       |      |                       |      |
|--------------------------------------------------------------|--------------------|------|-----------------------|------|-----------------------|------|-----------------------|------|
| A                                                            | B                  | C    | D                     | E    | F                     | G    | H                     | I    |
|                                                              | Original cell Line |      | Duplicate cell Line 1 |      | Duplicate Cell Line 2 |      | Duplicate Cell Line 3 |      |
| mys allele                                                   | Median             | S.E. | Median                | S.E. | Median                | S.E. | Median                | S.E. |
| XN101                                                        | 0.05               | 0.00 |                       |      |                       |      |                       |      |
| G12                                                          | 0.07               | 0.01 | 0.06                  | 0.01 |                       |      |                       |      |
| b47                                                          | 0.09               | 0.00 | 0.01                  | 0.02 |                       |      |                       |      |
| b3                                                           | 0.28               | 0.04 | 0.35                  | 0.10 |                       |      |                       |      |
| b63                                                          | 0.29               | 0.03 | 0.51                  | 0.03 |                       |      |                       |      |
| b22                                                          | 0.29               | 0.02 | 0.39                  | 0.02 |                       |      |                       |      |
| b23                                                          | 0.29               | 0.01 | 0.17                  | 0.03 |                       |      |                       |      |
| b58                                                          | 0.30               | 0.02 |                       |      |                       |      |                       |      |
| b30                                                          | 0.30               | 0.05 | 0.23                  | 0.04 |                       |      |                       |      |
| b21                                                          | 0.31               | 0.04 | 0.33                  | 0.05 |                       |      |                       |      |
| b37                                                          | 0.31               | 0.10 | 0.39                  | 0.04 |                       |      |                       |      |
| b69                                                          | 0.32               | 0.07 | 0.27                  | 0.07 |                       |      |                       |      |
| b26                                                          | 0.34               | 0.05 | 0.34                  | 0.07 |                       |      |                       |      |
| b51                                                          | 0.35               | 0.04 |                       |      |                       |      |                       |      |
| b52                                                          | 0.36               | 0.04 |                       |      |                       |      |                       |      |
| b67                                                          | 0.37               | 0.03 | 0.13                  | 0.01 |                       |      |                       |      |
| WTm10                                                        | 0.38               | 0.04 |                       |      |                       |      |                       |      |
| WTm5                                                         | 0.38               | 0.07 |                       |      |                       |      |                       |      |
| b13                                                          | 0.39               | 0.09 | 0.33                  | 0.10 |                       |      |                       |      |
| b40                                                          | 0.42               | 0.07 | 0.64                  | 0.10 |                       |      |                       |      |
| b53                                                          | 0.42               | 0.06 | 0.31                  | 0.08 |                       |      |                       |      |
| b57                                                          | 0.43               | 0.04 | 0.47                  | 0.10 |                       |      |                       |      |
| b68                                                          | 0.44               | 0.04 |                       |      |                       |      |                       |      |
| ts2                                                          | 0.44               | 0.05 |                       |      |                       |      |                       |      |
| b42                                                          | 0.45               | 0.02 |                       |      |                       |      |                       |      |
| b64                                                          | 0.48               | 0.06 |                       |      |                       |      |                       |      |
| b41                                                          | 0.48               | 0.04 |                       |      |                       |      |                       |      |
| b25                                                          | 0.49               | 0.07 |                       |      |                       |      |                       |      |
| WTm4                                                         | 0.50               | 0.03 |                       |      |                       |      |                       |      |
| b56                                                          | 0.50               | 0.08 |                       |      |                       |      |                       |      |
| b32                                                          | 0.51               | 0.06 |                       |      |                       |      |                       |      |
| WTm3                                                         | 0.52               | 0.11 |                       |      |                       |      |                       |      |
| b65                                                          | 0.53               | 0.18 |                       |      |                       |      |                       |      |
| b50                                                          | 0.53               | 0.05 |                       |      |                       |      |                       |      |
| b46                                                          | 0.55               | 0.07 | 0.99                  | 0.07 |                       |      |                       |      |
| b44                                                          | 0.57               | 0.15 | 0.24                  | 0.02 |                       |      |                       |      |
| b29                                                          | 0.57               | 0.03 |                       |      |                       |      |                       |      |
| b1                                                           | 0.59               | 0.07 | 0.75                  | 0.04 | 0.27                  | 0.04 | 0.38                  | 0.06 |
| b45                                                          | 0.60               | 0.16 | 0.28                  | 0.07 |                       |      |                       |      |
| b7                                                           | 0.61               | 0.08 |                       |      |                       |      |                       |      |
| b20                                                          | 0.62               | 0.03 | 0.32                  | 0.07 |                       |      |                       |      |
| b49                                                          | 0.62               | 0.06 | 0.47                  | 0.04 |                       |      |                       |      |
| b66                                                          | 0.63               | 0.09 |                       |      |                       |      |                       |      |
| b33                                                          | 0.63               | 0.08 |                       |      |                       |      |                       |      |
| WTm7                                                         | 0.64               | 0.05 |                       |      |                       |      |                       |      |
| b38                                                          | 0.64               | 0.13 | 0.76                  | 0.12 |                       |      |                       |      |
| b48                                                          | 0.66               | 0.15 | 0.76                  | 0.05 |                       |      |                       |      |
| b4                                                           | 0.70               | 0.07 |                       |      |                       |      |                       |      |
| b39                                                          | 0.73               | 0.11 | 1.64                  | 0.30 |                       |      |                       |      |
| WTm1                                                         | 0.74               | 0.11 |                       |      |                       |      |                       |      |
| WTm2                                                         | 0.74               | 0.14 |                       |      |                       |      |                       |      |
| WTm8                                                         | 0.74               | 0.09 |                       |      |                       |      |                       |      |
| b27                                                          | 0.77               | 0.06 |                       |      |                       |      |                       |      |
| b24                                                          | 0.83               | 0.06 | 0.61                  | 0.11 |                       |      |                       |      |
| G4                                                           | 0.87               | 0.13 | 0.78                  | 0.12 |                       |      |                       |      |
| WTm6                                                         | 0.88               | 0.08 |                       |      |                       |      |                       |      |
| b55                                                          | 0.91               | 0.08 |                       |      |                       |      |                       |      |
| b34                                                          | 0.96               | 0.07 |                       |      |                       |      |                       |      |
| b70                                                          | 0.96               | 0.22 | 0.23                  | 0.02 |                       |      |                       |      |
| b31                                                          | 1.03               | 0.07 |                       |      |                       |      |                       |      |
| WTm9                                                         | 1.06               | 0.16 |                       |      |                       |      |                       |      |

Table S1. Distribution of  $\alpha$ PS2C $\beta$ PS expression levels in cells expressing wild type or mutant  $\beta$ PS. Expression of cell-surface PS2C integrins in stably transformed cell lines expressing myc-tagged mutant  $\beta$ PS integrin subunits together with  $\alpha$ PS2C integrin subunits was determined by staining with the  $\alpha$ PS2 monoclonal antibody CF2C7 and analyzed by flow cytometry. Ten independent lines transformed with  $\alpha$ PS2C and myc-tagged wild type  $\beta$ PS were also tested (gray). The data are sorted by expression levels (Column B), from lowest to highest. Values are the median (Column B)  $\pm$  S.E. (Column C) of the PS2 integrin staining for 3 experiments, normalized to the untagged cell line 1 that was included in all experiments. The 3 mutants showing expression levels lower than 0.23 (two standard deviations below wild type levels) are shaded red in Column B. Independent transformed lines expressing mutant integrins were generated for several of the questionable mutants and their expression levels are also shown (Duplicates 1, 2 and 3, Columns D-I). Color coding of the mutant designations (Column A) is according to their affinity for TWOW-1 (see Table S2 for details); red, very low affinity; dark pink, low affinity; no shading, no significant change in affinity; light green, increased affinity; dark green and blue strongly increased affinity.
