# Supplementary material
Source: PubMed Central journal article supplement (PMC3162457)
Supplement: supp_M111.254797_jbc.M111.254797-2.pdf [file supp_M111.254797_jbc.M111.254797-2.pdf]

## Supplemental Table S2

| Table S2. Mutant and Wild Type TWOW-1 Binding Arranged by Binding Levels |              |              |               |          |      |          |       |          |          |      |              |      |       |
|--------------------------------------------------------------------------|--------------|--------------|---------------|----------|------|----------|-------|----------|----------|------|--------------|------|-------|
| A                                                                        | B            | C            | D             | E        | F    | G        | H     | I        | J        | K    | L            | M    | N     |
| mys                                                                      | $\beta$ PS   | $\beta$ 3 AA | Domain        | Relative |      | Relative | WT    | Relative | Relative |      | Relative     |      | Int.  |
| allele                                                                   | AA           |              |               | TWOW-1   |      | TWOW-1   | vs    | noMn/wMn | noMn/wMn |      | PS2 Integrin |      | with  |
|                                                                          | Change       |              |               | Binding  |      | Binding  | Mut   |          |          |      | Level        |      | rhea  |
|                                                                          |              |              |               | Median   | S.E. | Z score  | p=    | Z score  | Median   | S.E. | Median       | S.E. |       |
| G4                                                                       | S196F        | S123         | MIDAS         | 0.00     | 0.01 | -12.6    | 0.000 | -9.1     | 0.00     | 0.09 | 0.83         | 0.08 | G4    |
| b47                                                                      | A293T        | A225         | MIDAS/SyMBS   | 0.20     | 0.24 | -10.4    | 0.000 | -6.2     | 0.38     | 0.38 | 0.09         | 0.00 | b47   |
| b69*                                                                     | S272+SVRQ    | N204+        | MIDAS/SyMBS   | 0.28     | 0.15 | -9.5     | 0.000 | -5.7     | 0.44     | 0.20 | 0.29         | 0.04 | b69   |
| b13*                                                                     | E274V        | E206         | MIDAS/SyMBS   | 0.29     | 0.03 | -9.4     | 0.000 | -6.0     | 0.40     | 0.09 | 0.36         | 0.06 | b13   |
| b26*                                                                     | G227S        | G154         | SyMBS         | 0.35     | 0.11 | -8.6     | 0.000 | -6.4     | 0.35     | 0.14 | 0.34         | 0.04 | b26   |
| b33                                                                      | I50F         | L17          | PSI           | 0.88     | 0.13 | -2.7     | 0.149 | 0.7      | 1.29     | 0.10 | 0.63         | 0.08 | b33   |
| b66                                                                      | P336S        | P268         | $\beta$ -I    | 0.92     | 0.10 | -2.3     | 0.180 | -1.2     | 1.03     | 0.06 | 0.63         | 0.09 | b66   |
| G1                                                                       | delT825>     | delT741>     | Cytoplasmic   | 0.96     | 0.12 | -1.9     | 0.503 | 1.46     | 1.39     | 0.07 | 0.68         | 0.10 | G1    |
| b65*                                                                     | A310T        | A242         | $\beta$ -I    | 0.98     | 0.22 | -1.6     | 0.610 | 2.8      | 1.56     | 0.28 | 0.53         | 0.13 | b65   |
| b20*                                                                     | P242L        | P170         | $\beta$ -I    | 1.02     | 0.06 | -1.2     | 0.295 | -2.3     | 0.89     | 0.07 | 0.56         | 0.07 | b20   |
| WTm5                                                                     |              |              |               | 1.02     | 0.32 | -1.1     | 0.220 | 0.9      | 1.32     | 0.49 | 0.38         | 0.07 |       |
| b70*                                                                     | S836T, P841T | S752,I757    | Cytoplasmic   | 1.02     | 0.14 | -1.1     | 0.390 | 0.3      | 1.24     | 0.11 | 0.61         | 0.23 | b70   |
| b48*                                                                     | A325T        | A257         | $\beta$ -I    | 1.04     | 0.15 | -0.9     | 0.432 | -0.5     | 1.13     | 0.09 | 0.72         | 0.08 | b48   |
| b53*                                                                     | E387V        | N319         | $\beta$ -I    | 1.05     | 0.08 | -0.8     | 0.205 | -2.1     | 0.91     | 0.10 | 0.40         | 0.05 | b53   |
| WTm8                                                                     |              |              |               | 1.06     | 0.09 | -0.7     | 0.776 | -1.2     | 1.04     | 0.16 | 0.74         | 0.09 |       |
| WTm1                                                                     |              |              |               | 1.06     | 0.05 | -0.7     | 0.440 | -0.5     | 1.13     | 0.04 | 0.74         | 0.11 |       |
| b42                                                                      | G347S        | N279         | $\beta$ -I    | 1.09     | 0.15 | -0.3     | 0.831 | 1.0      | 1.33     | 0.18 | 0.45         | 0.02 | b42   |
| WTm2                                                                     |              |              |               | 1.09     | 0.07 | -0.3     | 0.616 | -0.3     | 1.16     | 0.05 | 0.74         | 0.14 |       |
| ts2                                                                      | G347D        | N279         | $\beta$ -I    | 1.10     | 0.11 | -0.2     | 0.595 | 1.4      | 1.38     | 0.12 | 0.44         | 0.05 | ts2   |
| WTm9                                                                     |              |              |               | 1.10     | 0.18 | -0.2     | 0.296 | 1.7      | 1.41     | 0.23 | 1.06         | 0.16 |       |
| b4                                                                       | C701Y        | C617         | $\beta$ -TD   | 1.11     | 0.04 | -0.1     | 0.634 | -0.3     | 1.16     | 0.04 | 0.70         | 0.07 | b4    |
| WTm6                                                                     |              |              |               | 1.11     | 0.00 | -0.1     | 0.788 | -0.6     | 1.12     | 0.06 | 0.88         | 0.08 |       |
| WTm3                                                                     |              |              |               | 1.12     | 0.04 | -0.1     | 0.805 | 0.3      | 1.24     | 0.05 | 0.52         | 0.11 |       |
| b34                                                                      | G707S        | G623         | $\beta$ -TD   | 1.12     | 0.07 | 0.0      | 0.451 | -0.2     | 1.17     | 0.07 | 0.96         | 0.07 | b34   |
| WTm4                                                                     |              |              |               | 1.14     | 0.00 | 0.2      | 0.905 | 0.0      | 1.19     | 0.00 | 0.50         | 0.03 |       |
| WTm7                                                                     |              |              |               | 1.17     | 0.06 | 0.6      | 0.607 | 1.0      | 1.33     | 0.05 | 0.64         | 0.05 |       |
| b32                                                                      | V763I        | S677         | $\beta$ -TD   | 1.21     | 0.11 | 0.9      | 0.962 | 2.1      | 1.46     | 0.10 | 0.51         | 0.06 | b32   |
| b24*                                                                     | E600K        | E522         | I-EGF2-3      | 1.21     | 0.1  | 1.0      | 0.102 | -0.4     | 1.14     | 0.06 | 0.61         | 0.08 | b24   |
| b39*                                                                     | G679D        | G595         | I-EGF4        | 1.23     | 0.08 | 1.2      | 0.311 | 1.1      | 1.33     | 0.15 | 1.03         | 0.27 | b39   |
| b7                                                                       | D404N        | D336         | $\beta$ -I    | 1.26     | 0.15 | 1.5      | 0.586 | 0.4      | 1.25     | 0.21 | 0.61         | 0.08 | b7    |
| b57*                                                                     | G339S        | G271         | $\beta$ -I    | 1.28     | 0.14 | 1.8      | 0.106 | -1.3     | 0.81     | 0.01 | 0.33         | 0.05 | b57   |
| b46*                                                                     | G596S        | G518         | I-EGF2        | 1.34     | 0.08 | 2.4      | 0.001 | 0.7      | 1.29     | 0.09 | 0.55         | 0.09 | b46   |
| Wtm10                                                                    |              |              |               | 1.34     | 0.05 | 2.5      | 0.197 | -1.5     | 1.00     | 0.09 | 0.38         | 0.04 |       |
| b1*                                                                      | G792D        | G708         | Transmembrane | 1.44     | 0.07 | 3.5      | 0.001 | -0.9     | 1.08     | 0.04 | 0.50         | 0.06 | b1    |
| b44*                                                                     | I375F        | I307         | ADMIDAS       | 1.44     | 0.09 | 3.6      | 0.001 | 3.2      | 1.61     | 0.13 | 0.38         | 0.12 | b44   |
| b49*                                                                     | H342Y        | H274         | $\beta$ -I    | 1.45     | 0.10 | 3.6      | 0.003 | 1.1      | 1.34     | 0.11 | 0.54         | 0.04 | b49   |
| b40*                                                                     | V775D        | P691         | $\beta$ -TD   | 1.51     | 0.08 | 4.4      | 0.001 | -0.2     | 1.16     | 0.09 | 0.56         | 0.08 | b40   |
| b63*                                                                     | G531D        | G458         | I-EGF1        | 1.53     | 0.08 | 4.6      | 0.001 | 2.0      | 1.46     | 0.10 | 0.39         | 0.06 | b63   |
| b30*                                                                     | I298F        | T230         | $\beta$ -I    | 1.56     | 0.10 | 4.9      | 0.001 | 0.4      | 1.25     | 0.09 | 0.24         | 0.03 | b30   |
| b45*                                                                     | R312Q        | H244         | ADMIDAS       | 1.57     | 0.19 | 5.0      | 0.000 | 3.2      | 1.62     | 0.27 | 0.29         | 0.09 | b45   |
| b55                                                                      | R587Q        | S511         | I-EGF2        | 1.58     | 0.10 | 5.2      | 0.000 | 5.9      | 1.96     | 0.10 | 0.91         | 0.08 | b55   |
| b50                                                                      | S272+Q       | N204+        | MIDAS/SyMBS   | 1.65     | 0.06 | 5.9      | 0.000 | 4.2      | 1.75     | 0.13 | 0.53         | 0.05 | b50   |
| b22*                                                                     | R676C        | G592         | I-EGF4        | 1.65     | 0.12 | 5.9      | 0.000 | 4.2      | 1.74     | 0.14 | 0.34         | 0.03 | b22   |
| b3*                                                                      | C58S         | C26          | PSI           | 1.72     | 0.52 | 6.7      | 0.000 | 3.6      | 1.66     | 0.18 | 0.30         | 0.05 | b3    |
| b38*                                                                     | L224F        | I151         | ADMIDAS       | 1.73     | 0.33 | 6.9      | 0.000 | 4.5      | 1.79     | 0.40 | 0.69         | 0.08 | b38   |
| b31                                                                      | G541S        | G468         | I-EGF1        | 1.76     | 0.10 | 7.2      | 0.000 | 8.1      | 2.25     | 0.11 | 1.03         | 0.07 | b31   |
| b56                                                                      | G395S        | G327         | ADMIDAS       | 1.81     | 0.11 | 7.7      | 0.000 | 5.4      | 1.90     | 0.06 | 0.50         | 0.08 | b56   |
| b37*                                                                     | C441Y        | C374         | Hybrid        | 1.81     | 0.24 | 7.8      | 0.000 | -1.4     | 0.97     | 0.14 | 0.23         | 0.06 | b37   |
| b68                                                                      | C58Y         | C26          | PSI           | 1.82     | 0.11 | 7.9      | 0.000 | 10.1     | 2.52     | 0.08 | 0.44         | 0.04 | b68   |
| b21*                                                                     | L264F        | L196         | ADMIDAS       | 1.84     | 0.30 | 8.1      | 0.000 | 6.2      | 2.01     | 0.54 | 0.32         | 0.03 | b21   |
| b41                                                                      | C40Y         | C5           | PSI           | 1.90     | 0.03 | 8.7      | 0.000 | 12.2     | 2.80     | 0.12 | 0.48         | 0.04 | b41   |
| b25                                                                      | S317L        | T249         | ADMIDAS       | 1.91     | 0.12 | 8.8      | 0.000 | 7.8      | 2.22     | 0.09 | 0.49         | 0.07 | b25   |
| b52                                                                      | G596R        | G518         | I-EGF2        | 1.92     | 0.24 | 9.0      | 0.000 | 6.8      | 2.09     | 0.38 | 0.36         | 0.04 | b52   |
| XN101                                                                    | C629S        | C549         | I-EGF3        | 1.94     | 0.46 | 9.1      | 0.000 | 6.3      | 2.02     | 0.50 | 0.05         | 0.00 | XN101 |
| b29                                                                      | F743I        | Y657         | $\beta$ -TD   | 2.00     | 0.23 | 9.9      | 0.000 | 4.7      | 1.81     | 0.23 | 0.57         | 0.03 | b29   |
| b58                                                                      | V409D        | L341         | ADMIDAS       | 2.07     | 0.14 | 10.6     | 0.000 | 9.3      | 2.41     | 0.17 | 0.30         | 0.02 | b58   |
| b67*                                                                     | D200N        | D127         | ADMIDAS       | 2.15     | 0.11 | 11.6     | 0.000 | 1.5      | 1.39     | 0.04 | 0.25         | 0.06 | b67   |
| b27                                                                      | V423E        | V355         | Hybrid        | 2.21     | 0.16 | 12.3     | 0.000 | 7.0      | 2.11     | 0.24 | 0.77         | 0.06 | b27   |
| b64                                                                      | C544Y        | C471         | I-EGF1        | 2.40     | 0.26 | 14.4     | 0.000 | 9.1      | 2.38     | 0.29 | 0.48         | 0.06 | b64   |
| b51                                                                      | E607K        | V529         | I-EGF3        | 3.51     | 0.17 | 26.8     | 0.000 | 22.3     | 4.12     | 0.59 | 0.35         | 0.04 | b51   |
| b23*                                                                     | N407Y        | N339         | ADMIDAS       | 3.61     | 0.24 | 26.0     | 0.000 | 14.6     | 3.11     | 0.21 | 0.24         | 0.03 | b23   |

Table S2. Distribution of TWOW-1 binding of wild type and mutant  $\beta$ PS integrins expressed together with  $\alpha$ PS2C in stably transformed cell lines. Data are sorted by increasing binding levels. Also shown is the ratio of binding without  $Mn^{2+}$  (non-activating conditions) to binding with  $Mn^{2+}$  (activating conditions) and expression levels. Gray shading in all Columns indicates wild type integrins.

Columns are:

- A. Mutant allele name. \* multiple independent cell lines were tested. Shading of boxes indicates effects of the mutation on TWOW-1 binding levels; red, z scores less than -10; dark pink, z scores between -5 and -10; no fill, z scores between -2.7 and 2.4; light green, z scores between 2.4 and 4.9; dark green z scores between 5 and 10; blue, z scores greater than 10.
- B. Amino acid change in  $\beta$ PS integrin. S272+SVRQ and S272+Q (b69 and b50) indicates insertion of VRQ or Q following amino acid 272. delT825\*> (*mys*<sup>G1</sup>) refers to carboxy-terminal, 21 amino acids deleted and replaced by 25 essentially random amino acids (due to a splice site mutation).
- C. Corresponding amino acid in human  $\beta$ 3 integrin.
- D. The domain of the  $\beta$  subunit in which the mutation is located or is predicted to alter.
- E. The median of the PS2C integrin staining for 3-12 experiments, normalized to the WT1 cell line (untagged wild type line 1).
- F. S.E. of Column E.
- G. The z score, number of standard deviations below (negative values) or above (positive values) the mean TWOW-1 binding of the 10 independent lines expressing wild type PS2C integrins. See Column A for shading description.
- H. P value determined by Student's t-test comparison of mutant TWOW-1 binding with the tests of the 10 independent lines expressing wild type PS2C integrins. Significant values for reduction in binding are shaded in pink and for increased binding in light green.
- I. The z-scores of the "activation index" (see Column J) -- number of standard deviations below (negative values) or above (positive values) the mean of the 10 independent lines expressing wild type PS2C integrins. See Column A for shading description.
- J. The median of the "activation index" [ratio of TWOW-1 binding without  $Mn^{2+}$  (non-activating conditions) to binding with  $Mn^{2+}$  (activating conditions)]. Each experiment was normalized to the "activation index" of WT1 cell line (included in all experiments).
- K. S.E. of Column J.
- L. Median of PS2C integrin expression levels as determined by staining PS2 integrins with an  $\alpha$ PS2 antibody and normalizing levels to the WT1 cell line. Red shading indicates expression levels more than 2 standard deviations below the mean of the 10 independent lines expressing wild type PS2C integrins.
- M. S.E. of Column 9.
- N. Results of genetic interaction tests with *rhea*, which encodes talin (from supplemental Table S5). Dark pink indicates an enhancing interaction—flies with the  $\beta$ PS mutation are more lethal with only one wild type copy of *rhea* than when they contain 2 wild type copies of *rhea*. Green indicates a rescuing interaction-- flies with the  $\beta$ PS mutation are less lethal with only one wild type copy of *rhea* than when they contain 2 wild type copies of *rhea*. No shading indicates a lack of significant difference in lethality. Tan shading indicates that there was insufficient lethality at high temperatures to perform the test. Some mutants were completely lethal (brown) at even the lowest temperature tested and so the interaction test could not be performed.
