# Supplementary material
Source: PubMed Central journal article supplement (PMC3162457)
Supplement: supp_M111.254797_jbc.M111.254797-4.pdf [file supp_M111.254797_jbc.M111.254797-4.pdf]

Supplemental Table S4

| Table S4. TWOW-1 Binding of Site-Directed Mutations          |                    |                    |         |          |      |          |          |          |              |          |        |      |
|--------------------------------------------------------------|--------------------|--------------------|---------|----------|------|----------|----------|----------|--------------|----------|--------|------|
| A                                                            | B                  | C                  | D       | E        | F    | G        | H        | I        | J            | K        | L      | M    |
| mys allele                                                   | βPS AA Change      | β3 AA              | Domain  | Relative | WT   |          |          | Relative | Relative     | Relative |        |      |
|                                                              |                    |                    |         | TWOW-1   | vs   | No Mn/Mn | No Mn/Mn | No Mn/Mn | PS2 Integrin |          |        |      |
|                                                              |                    |                    |         | Binding  |      |          | Mut      |          |              |          | Level  |      |
|                                                              |                    |                    |         | Median   | S.E. | Z score  | p=       | Z score  | Median       | S.E.     | Median | S.E. |
| <b>βPS Long Range disulfide mutant</b>                       |                    |                    |         |          |      |          |          |          |              |          |        |      |
|                                                              | CC(46&505)AA       | C13 &C435          | PSI     | 2.18     | 0.19 | 11.9     | 0.000    | 9.88     | 2.49         | 0.21     | 0.87   | 0.03 |
| <b>βPS SyMBS Mutants</b>                                     |                    |                    |         |          |      |          |          |          |              |          |        |      |
|                                                              | D231>A             | D158               | SyMBS   | -0.07    | 0.09 | -13.4    | 0.000    | -19.21   | -1.33        | 2.67     | 0.31   | 0.08 |
|                                                              | N283>A             | N215               | SyMBS   | 0.08     | 0.04 | -11.7    | 0.000    | -5.80    | 0.43         | 0.16     | 0.28   | 0.07 |
| <b>βPS ADMIDAS Mutants</b>                                   |                    |                    |         |          |      |          |          |          |              |          |        |      |
| b67                                                          | D200N              | D127               | ADMIDAS | 2.15     | 0.11 | 11.6     | 0.000    | 1.5      | 1.39         | 0.04     | 0.25   | 0.06 |
|                                                              | D200K              | D127               | ADMIDAS | 2.86     | 0.18 | 19.6     | 0.000    | 5.01     | 1.85         | 0.05     | 0.34   | 0.05 |
|                                                              | D200A              | D127               | ADMIDAS | 1.47     | 0.16 | 3.9      | 0.004    | 3.02     | 1.59         | 0.17     | 0.37   | 0.07 |
|                                                              | D200S              | D127               | ADMIDAS | 1.23     | 0.09 | 1.2      | 0.214    | -1.59    | 0.99         | 0.02     | 0.32   | 0.02 |
|                                                              | D199A*             | D126               | ADMIDAS | 1.55     | 0.16 | 4.8      | 0.002    | -1.89    | 0.95         | 0.05     | 0.23   | 0.03 |
|                                                              | D199S*             | D126               | ADMIDAS | 1.65     | 0.18 | 5.9      | 0.000    | -0.6     | 1.07         | 0.11     | 0.20   | 0.05 |
| <b>βPS Deadbolt Mutants</b>                                  |                    |                    |         |          |      |          |          |          |              |          |        |      |
|                                                              | delQ758-H762       | delD672-K676       | β-TD    | 3.96     | 1.31 | 31.8     | 0.000    | 5.69     | 1.94         | 0.17     | 0.11   | 0.02 |
|                                                              | R717A              | R633A              | β-TD    | 1.28     | 0.04 | 1.8      | 0.275    | -2.67    | 0.84         | 0.04     | 0.45   | 0.11 |
|                                                              | delQ758-H762+R717A | delD672-K676+R633A | β-TD    | 4.2      | 0.5  | 34.8     | 0.000    | 14.07    | 2.38         | 0.19     | 0.14   | 0.02 |
| <b>βPS Transmembrane (TM) and Cytoplasmic (Cyto) Mutants</b> |                    |                    |         |          |      |          |          |          |              |          |        |      |
| b1*                                                          | G792D              | G708               | TM      | 1.44     | 0.07 | 3.5      | 0.001    | -0.9     | 1.08         | 0.04     | 0.50   | 0.06 |
| b70*                                                         | S836T, P841T       | S752,I757          | Cyto    | 1.02     | 0.14 | -1.1     | 0.390    | 0.3      | 1.24         | 0.11     | 0.61   | 0.23 |
|                                                              | D807R**            | D723               | Cyto    | 1.28     | 0.07 | 1.8      | 0.375    | -0.37    | 1.09         | 0.09     | 0.49   | 0.09 |
| G1                                                           | T825>              | T741>              | Cyto    | 0.96     | 0.12 | -1.9     | 0.503    | 1.46     | 1.39         | 0.07     | 0.68   | 0.10 |
|                                                              | Trunc              | T741>              | Cyto    | 0.96     | 0.07 | -1.9     | 0.212    | -1.10    | 1.05         | 0.07     | 0.44   | 0.06 |
| <b>αPS2 Cytoplasmic Mutants</b>                              |                    |                    |         |          |      |          |          |          |              |          |        |      |
|                                                              | CGFFNR>CGFFNA**    |                    | Cyto    | 1.24     | 0.04 | 1.3      | 0.178    | 0.84     | 1.20         | 0.05     | 0.93   | 0.03 |
|                                                              | CGFFNR>CGFANA      |                    | Cyto    | 3.24     | 0.06 | 23.8     | 0.000    | 12.48    | 2.83         | 0.31     | 0.77   | 0.09 |
|                                                              | CGFFNR>VGFNFR*     |                    | Cyto    | 0.51     | 0.04 | -6.8     | 0.000    | -4.01    | 0.77         | 0.05     | 0.42   | 0.07 |

Table S4. TWOW-1 binding of site-directed mutations. Columns and shading is the same as in Table S2. As in Table S2 shading in Column A is according to TWOW-1 binding ability (Column G); red, z scores less than -10; dark pink, z scores between -5 and -10; no fill, z scores between -2.9 and 2.9; light green, z scores between 3 and 5; blue, z scores greater than 10. \* multiple independent cell lines were tested. \*\* cell lines with and without the myc-tag were tested and gave similar results that were combined.
