# Supplementary material
Source: PubMed Central journal article supplement (PMC3162457)
Supplement: supp_M111.254797_jbc.M111.254797-5.pdf [file supp_M111.254797_jbc.M111.254797-5.pdf]

Supplemental Table S5

| Table S5. Genetic Interactions Between <i>mys</i> & <i>rhea</i> |                             |                                       |      |    |                           |                 |    |                                  |              |    |                                |                              |                                     |                                  |                                        |      |                                     |   |             |   |  |   |  |   |  |   |
|-----------------------------------------------------------------|-----------------------------|---------------------------------------|------|----|---------------------------|-----------------|----|----------------------------------|--------------|----|--------------------------------|------------------------------|-------------------------------------|----------------------------------|----------------------------------------|------|-------------------------------------|---|-------------|---|--|---|--|---|--|---|
| A                                                               | B                           | C                                     |      | D  |                           | E               |    | F                                |              | G  |                                | H                            |                                     | I                                |                                        | J    |                                     | K |             | L |  | M |  | N |  | O |
| mys<br>TWOV<br>Shading                                          | mys<br>rhea int.<br>Shading | Test#1<br>Viability<br>male vs female |      | P= | Test#2<br>males<br>mys/wt |                 | P= | Test#2<br>females<br>mys het./wt |              | P= | Progeny<br>males<br>mys; rhea+ | Progeny<br>males<br>mys; +/+ | Progeny<br>females<br>mys/+; rhea/+ | Progeny<br>females<br>mys/+; +/+ | rhea/+<br>% viability<br>males/females |      | +/+<br>% viability<br>males/females |   | Temp.<br>°C |   |  |   |  |   |  |   |
|                                                                 |                             | Column                                | M/N  |    | (I/J)/(mys+I/J)           | (K/L)/(mys+K/L) |    | (Column I/K)                     | (Column J/L) |    |                                |                              |                                     |                                  |                                        |      |                                     |   |             |   |  |   |  |   |  |   |
| b47                                                             | b47                         | 0.3                                   | 0.00 |    | 0.2                       | 0.00            |    | 0.9                              | 0.56         |    | 7                              | 26                           | 129                                 | 141                              | 5%                                     | 18%  |                                     |   | 22          |   |  |   |  |   |  |   |
| b69                                                             | b69                         | 0.1                                   | 0.00 |    | 0.1                       | 0.00            |    | 0.7                              | 0.06         |    | 2                              | 24                           | 60                                  | 75                               | 3%                                     | 32%  |                                     |   | 25          |   |  |   |  |   |  |   |
| b13                                                             | b13                         | 0.1                                   | 0.00 |    | 0.1                       | 0.00            |    | 1.1                              | 0.71         |    | 1                              | 12                           | 44                                  | 39                               | 2%                                     | 31%  |                                     |   | 22          |   |  |   |  |   |  |   |
| b26                                                             | b26                         | leth 18                               |      |    |                           |                 |    | 1.1                              | 0.56         |    | 0                              | 0                            | 164                                 | 134                              | 0%                                     | 0%   |                                     |   | 18          |   |  |   |  |   |  |   |
| b33                                                             | b33                         | 2.3                                   | 0.01 |    | 2.2                       | 0.01            |    | 0.9                              | 0.59         |    | 40                             | 16                           | 170                                 | 153                              | 24%                                    | 10%  |                                     |   | 31*         |   |  |   |  |   |  |   |
| b66                                                             | b66                         | 9.0                                   | 0.01 |    | 8.9                       | 0.01            |    | 1.0                              | 0.91         |    | 10                             | 1                            | 366                                 | 328                              | 3%                                     | 0%   |                                     |   | 18          |   |  |   |  |   |  |   |
| b65                                                             | b65                         | 1.7                                   | 0.01 |    | 1.4                       | 0.10            |    | 0.8                              | 0.12         |    | 87                             | 54                           | 106                                 | 114                              | 82%                                    | 47%  |                                     |   | 31*         |   |  |   |  |   |  |   |
| b20                                                             | b20                         | 0.8                                   | 0.48 |    | 0.6                       | 0.02            |    | 0.7                              | 0.02         |    | 51                             | 75                           | 81                                  | 101                              | 63%                                    | 74%  |                                     |   | 31*         |   |  |   |  |   |  |   |
| b70                                                             | b70                         | 0.1                                   | 0.00 |    | 0.1                       | 0.00            |    | 0.8                              | 0.34         |    | 4                              | 62                           | 226                                 | 261                              | 2%                                     | 24%  |                                     |   | 22          |   |  |   |  |   |  |   |
| b48                                                             | b48                         | 0.6                                   | 0.02 |    | 0.5                       | 0.00            |    | 0.8                              | 1.6          |    | 37                             | 69                           | 103                                 | 107                              | 36%                                    | 64%  |                                     |   | 31*         |   |  |   |  |   |  |   |
| b53                                                             | b53                         | 0.7                                   | 0.22 |    | 0.3                       | 0.00            |    | 0.4                              | 0.00         |    | 16                             | 46                           | 55                                  | 105                              | 29%                                    | 44%  |                                     |   | 31*         |   |  |   |  |   |  |   |
| b42                                                             | b42                         | 0.9                                   | 0.54 |    | 0.8                       | 0.13            |    | 0.8                              | 0.14         |    | 113                            | 129                          | 164                                 | 169                              | 69%                                    | 76%  |                                     |   | 31*         |   |  |   |  |   |  |   |
| ts2                                                             | ts2                         | 0.8                                   | 0.36 |    | 1.2                       | 0.36            |    | 1.8                              | 0.00         |    | 71                             | 47                           | 281                                 | 153                              | 25%                                    | 31%  |                                     |   | 28          |   |  |   |  |   |  |   |
| b4                                                              | b4                          | 0.5                                   | 0.01 |    | 0.3                       | 0.00            |    | 0.6                              | 0.00         |    | 20                             | 57                           | 95                                  | 131                              | 21%                                    | 44%  |                                     |   | 31*         |   |  |   |  |   |  |   |
| b34                                                             | b34                         | 1.6                                   | 0.05 |    | 1.6                       | 0.05            |    | 0.9                              | 0.62         |    | 78                             | 44                           | 88                                  | 80                               | 89%                                    | 55%  |                                     |   | 31*         |   |  |   |  |   |  |   |
| b32                                                             | b32                         | 1.8                                   | 0.03 |    | 1.7                       | 0.05            |    | 1.1                              | 0.75         |    | 63                             | 31                           | 65                                  | 59                               | 97%                                    | 53%  |                                     |   | 22          |   |  |   |  |   |  |   |
| b24                                                             | b24                         | 2.2                                   | 0.00 |    | 2.2                       | 0.00            |    | 1.0                              | 0.90         |    | 87                             | 34                           | 106                                 | 90                               | 82%                                    | 38%  |                                     |   | 31*         |   |  |   |  |   |  |   |
| b39                                                             | b39                         | 1.2                                   | 0.37 |    | 1.3                       | 0.32            |    | 1.0                              | 0.78         |    | 63                             | 44                           | 94                                  | 82                               | 67%                                    | 54%  |                                     |   | 31*         |   |  |   |  |   |  |   |
| b7                                                              | b7                          | 1.06                                  | 0.69 |    | 1.0                       | 0.91            |    | 0.9                              | 0.33         |    | 149                            | 133                          | 232                                 | 220                              | 64%                                    | 60%  |                                     |   | 31*         |   |  |   |  |   |  |   |
| b57                                                             | b57                         | 24.9                                  | 0.00 |    | 23.2                      | 0.00            |    | 0.9                              | 0.42         |    | 53                             | 2                            | 161                                 | 151                              | 33%                                    | 1%   |                                     |   | 31*         |   |  |   |  |   |  |   |
| b46                                                             | b46                         | 0.9                                   | 0.67 |    | 1.0                       | 0.90            |    | 1.0                              | 1.00         |    | 115                            | 103                          | 159                                 | 132                              | 72%                                    | 78%  |                                     |   | 31*         |   |  |   |  |   |  |   |
| b1                                                              | b1                          | 1.2                                   | 0.43 |    | 1.3                       | 0.22            |    | 1.1                              | 0.59         |    | 61                             | 40                           | 386                                 | 300                              | 16%                                    | 13%  |                                     |   | 31*         |   |  |   |  |   |  |   |
| b44                                                             | b44                         | 2.8                                   | 0.00 |    | 2.4                       | 0.00            |    | 0.9                              | 0.59         |    | 132                            | 49                           | 224                                 | 235                              | 59%                                    | 21%  |                                     |   | 28          |   |  |   |  |   |  |   |
| b49                                                             | b49                         | 1.1                                   | 0.83 |    | 1.0                       | 0.97            |    | 0.9                              | 0.58         |    | 43                             | 38                           | 51                                  | 48                               | 84%                                    | 79%  |                                     |   | 31*         |   |  |   |  |   |  |   |
| b40                                                             | b40                         | 0.6                                   | 0.17 |    | 0.1                       | 0.00            |    | 0.2                              | 0.00         |    | 12                             | 77                           | 18                                  | 66                               | 67%                                    | 117% |                                     |   | 31*         |   |  |   |  |   |  |   |
| b63                                                             | b63                         | 0.9                                   | 0.67 |    | 0.8                       | 0.22            |    | 0.8                              | 0.20         |    | 119                            | 129                          | 148                                 | 149                              | 80%                                    | 87%  |                                     |   | 31*         |   |  |   |  |   |  |   |
| b30                                                             | b30                         | 13.3                                  | 0.00 |    | 15.8                      | 0.00            |    | 1.2                              | 0.27         |    | 124                            | 7                            | 282                                 | 212                              | 44%                                    | 3%   |                                     |   | 18          |   |  |   |  |   |  |   |
| b45                                                             | b45                         | 8.2                                   | 0.00 |    | 5.7                       | 0.00            |    | 0.7                              | 0.00         |    | 39                             | 6                            | 149                                 | 187                              | 26%                                    | 3%   |                                     |   | 31*         |   |  |   |  |   |  |   |
| b55                                                             | b55                         | 0.4                                   | 0.00 |    | 0.1                       | 0.00            |    | 0.3                              | 0.00         |    | 18                             | 144                          | 44                                  | 134                              | 41%                                    | 107% |                                     |   | 31*         |   |  |   |  |   |  |   |
| b50                                                             | b50                         | 0.8                                   | 0.22 |    | 0.8                       | 0.20            |    | 1.0                              | 0.78         |    | 57                             | 66                           | 102                                 | 89                               | 56%                                    | 74%  |                                     |   | 31*         |   |  |   |  |   |  |   |
| b22                                                             | b22                         | leth 18                               |      |    |                           |                 |    | 1.0                              | 0.98         |    | 0                              | 0                            | 130                                 | 118                              | 0%                                     | 0%   |                                     |   | 18          |   |  |   |  |   |  |   |
| b3                                                              | b3                          | 4.7                                   | 0.01 |    | 5.9                       | 0.01            |    | 1.4                              | 1.00         |    | 20                             | 3                            | 128                                 | 91                               | 16%                                    | 3%   |                                     |   | 28          |   |  |   |  |   |  |   |
| b38                                                             | b38                         | 0.8                                   | 0.35 |    | 0.6                       | 0.01            |    | 0.7                              | 0.04         |    | 55                             | 82                           | 84                                  | 101                              | 65%                                    | 81%  |                                     |   | 31*         |   |  |   |  |   |  |   |
| b31                                                             | b31                         | 1.1                                   | 0.56 |    | 1.1                       | 0.72            |    | 0.9                              | 0.54         |    | 149                            | 123                          | 174                                 | 158                              | 86%                                    | 78%  |                                     |   | 31*         |   |  |   |  |   |  |   |
| b56                                                             | b56                         | 3.7                                   | 0.00 |    | 3.2                       | 0.00            |    | 0.8                              | 0.14         |    | 83                             | 23                           | 166                                 | 171                              | 50%                                    | 13%  |                                     |   | 31*         |   |  |   |  |   |  |   |
| b37                                                             | b37                         | 0.7                                   | 0.12 |    | 0.8                       | 0.28            |    | 1.1                              | 0.64         |    | 52                             | 58                           | 111                                 | 85                               | 47%                                    | 68%  |                                     |   | 31*         |   |  |   |  |   |  |   |
| b68                                                             | b68                         | 13.9                                  | 0.00 |    | 11.3                      | 0.00            |    | 1.0                              | 0.86         |    | 55                             | 4                            | 211                                 | 213                              | 26%                                    | 2%   |                                     |   | 22          |   |  |   |  |   |  |   |
| b21                                                             | b21                         | 0.7                                   | 0.66 |    | 0.6                       | 0.56            |    | 0.8                              | 0.20         |    | 2                              | 3                            | 169                                 | 169                              | 1%                                     | 2%   |                                     |   | 31*         |   |  |   |  |   |  |   |
| b41                                                             | b41                         | 2.3                                   | 0.04 |    | 2.3                       | 0.03            |    | 1.0                              | 0.90         |    | 26                             | 10                           | 62                                  | 55                               | 42%                                    | 18%  |                                     |   | 18          |   |  |   |  |   |  |   |
| b25                                                             | b25                         | 0.9                                   | 0.61 |    | 0.9                       | 0.43            |    | 0.9                              | 0.46         |    | 143                            | 143                          | 193                                 | 178                              | 74%                                    | 80%  |                                     |   | 31*         |   |  |   |  |   |  |   |
| b52                                                             | b52                         | 3.6                                   | 0.04 |    | 2.8                       | 0.11            |    | 0.8                              | 0.12         |    | 10                             | 3                            | 156                                 | 169                              | 6%                                     | 2%   |                                     |   | 25*         |   |  |   |  |   |  |   |
| b29                                                             | b29                         | 2.2                                   | 0.00 |    | 2.0                       | 0.01            |    | 0.9                              | 0.29         |    | 59                             | 26                           | 213                                 | 205                              | 28%                                    | 13%  |                                     |   | 31*         |   |  |   |  |   |  |   |
| b58                                                             | b58                         | 0.5                                   | 0.02 |    | 0.5                       | 0.02            |    | 0.9                              | 0.68         |    | 30                             | 49                           | 110                                 | 98                               | 27%                                    | 50%  |                                     |   | 31*         |   |  |   |  |   |  |   |
| b67                                                             | b67                         | 0.1                                   | 0.00 |    | 0.1                       | 0.01            |    | 1.2                              | 0.44         |    | 1                              | 9                            | 181                                 | 143                              | 1%                                     | 6%   |                                     |   | 18          |   |  |   |  |   |  |   |
| b27                                                             | b27                         | 3.5                                   | 0.00 |    | 3.8                       | 0.00            |    | 1.0                              | 0.88         |    | 73                             | 17                           | 284                                 | 231                              | 26%                                    | 7%   |                                     |   | 31*         |   |  |   |  |   |  |   |
| b64                                                             | b64                         | 9.5                                   | 0.00 |    | 8.9                       | 0.00            |    | 1.0                              | 0.80         |    | 20                             | 2                            | 344                                 | 328                              | 6%                                     | 1%   |                                     |   | 18          |   |  |   |  |   |  |   |
| b51                                                             | b51                         | 2.1                                   | 0.02 |    | 2.2                       | 0.03            |    | 1.1                              | 0.68         |    | 32                             | 13                           | 449                                 | 383                              | 7%                                     | 3%   |                                     |   | 18          |   |  |   |  |   |  |   |
| b23                                                             | b23                         | leth 18                               |      |    |                           |                 |    | 0.9                              | 0.49         |    | 0                              | 0                            | 88                                  | 93                               | 0%                                     | 0%   |                                     |   | 18          |   |  |   |  |   |  |   |
| Wild type controls                                              |                             |                                       |      |    |                           |                 |    |                                  |              |    |                                |                              |                                     |                                  |                                        |      |                                     |   |             |   |  |   |  |   |  |   |
|                                                                 | mys+                        | 1.03                                  | 0.90 |    |                           |                 |    |                                  |              |    | 109                            | 97                           | 92                                  | 84                               | 118%                                   | 115% |                                     |   | 18          |   |  |   |  |   |  |   |
|                                                                 | mys+                        | 1.19                                  | 0.43 |    |                           |                 |    |                                  |              |    | 91                             | 75                           | 88                                  | 86                               | 103%                                   | 87%  |                                     |   | 22          |   |  |   |  |   |  |   |
|                                                                 | mys+                        | 1.00                                  | 1.00 |    |                           |                 |    |                                  |              |    | 131                            | 109                          | 131                                 | 109                              | 100%                                   | 100% |                                     |   | 25          |   |  |   |  |   |  |   |
|                                                                 | mys+                        | 1.27                                  | 0.15 |    |                           |                 |    |                                  |              |    | 157                            | 120                          | 165                                 | 160                              | 95%                                    | 75%  |                                     |   | 28          |   |  |   |  |   |  |   |
|                                                                 | mys+                        | 0.95                                  | 0.72 |    |                           |                 |    |                                  |              |    | 154                            | 135                          | 230                                 | 191                              | 67%                                    | 71%  |                                     |   | 31*         |   |  |   |  |   |  |   |

Table S5. Genetic interactions between *mys* mutants and *rhea*. Mutant *mys* alleles were tested for genetic interactions with *rhea* (encoding talin) that alter lethality. *mys*<sup>+</sup>; *rhea*<sup>2</sup>/*rhea*<sup>+</sup> males were mated to *mys*/*mys*; *rhea*<sup>+</sup>/*rhea*<sup>+</sup> females. Numbers of male and female progeny of each class is given in Columns I-L. The temperature of the crosses that result in significant lethality varied for different *mys* alleles and is indicated in Column O. In this Column 31\* indicates that the cross and egg laying were done at either 28°C or 25°C and then shifted up to 31°C. 25\* indicates that egg laying was done at 18°C and then shifted to 25°C.

The genetic interaction results are presented based on the previously determined TWOV-1 binding ability of the *mys* alleles (from low to high) and color coding of the alleles in Column A is the same as in Table S2. Color coding of the results of genetic interactions between *mys* alleles and *rhea* is shown in Column B. Where reduction in talin levels rescues lethality of the *mys* allele shading is light green. Where

reduction in talin levels increases lethality of the *mys* allele shading is magenta. Where reduction in talin levels had no effect no shading is applied. *mys*<sup>b26</sup>, *mys*<sup>b22</sup>, and *mys*<sup>b23</sup> males were lethal at the lowest temperature tested (18°C) and so could not be examined for *rhea* interactions (brown in Columns B, C, M, and N). Twelve other alleles also could not be examined for interactions with *rhea* in this test because they did not show enough lethality even at the highest temperature (31°C) tested (tan in Columns B, C, M and N).

The relative viability of males hemizygous for the indicated *mys* allele (as *mys* is on the X chromosome) with one versus two wild type copies of *rhea* (located on chromosome 3) was determined in two ways and is displayed in Columns C and E together with P values from two-proportion Z-tests (Columns D and F). Effects of talin reduction on females heterozygous for the *mys* allele is given in Column G (P values in Column H).

For the first two-proportion Z-test, relative lethality was determined by comparing two proportions and the results are given in Column C (with P value in Column D). The first proportion (Column M) is the number of *mys* males with only one wild type copy *rhea* (Column I) as compared to the number of females heterozygous for both *mys* and *rhea* (Column K). The second, control, proportion (Column N) is the number of *mys* males with two wild type copies of the *rhea* (Column J) compared to the number of females heterozygous for *mys* with two wild type copies of *rhea* (Column L). Dividing the values when only one copy of *rhea* is present (Column M) by that when two copies are present (Column N) results in one test of relative viability (Column C and D). This test has the advantage of having all progeny, experimental and controls, raised in the same vials under identical conditions. It has the caveat, however, that mutant *mys* allele may not always be completely rescued by *mys*<sup>+</sup> in heterozygotes.

The second test of *mys* and *rhea* interaction uses two different proportions. The first is the number of *mys* males with only one wild type copy of *rhea* (Column I) compared to the number of *mys* males with two wild type copies of *rhea* (Column J). The second, control, proportion is from a separate cross. *mys*<sup>+</sup>; *rhea*<sup>2</sup>/*rhea*<sup>+</sup> males were mated to wild type females at all temperatures. Results of this cross are at the end of the table and labeled *mys*<sup>+</sup>. In these control crosses, wild type males heterozygous for *rhea* (Column I) were compared with wild type males (Column J). Comparing these two proportions gives a relative viability for males (Columns E and F). The same type of analysis was used to compare females heterozygous for *mys* alleles and those bearing two wild type copies of *mys* (Columns G and H).

For male lethality the results of both analyses are very consistent. 17 of 19 of cases where *rhea*<sup>+</sup> shows rescue of *mys* lethality in males are detected by both tests and the exceptions, *mys*<sup>b65</sup> and *mys*<sup>b52</sup>, trend in that direction in the second test but do not reach significance (P=0.1 & 0.11). Where *rhea*<sup>+</sup> enhances *mys* lethality in males, 9 of 13 are detected by both tests and the exceptions, *mys*<sup>b20</sup>, *mys*<sup>b40</sup>, *mys*<sup>b53</sup>, and *mys*<sup>b38</sup> do not show the interaction in the first test due to *rhea*<sup>+</sup> enhanced lethality in both *mys* males and heterozygous females. Interactions between *rhea*<sup>+</sup> and *mys*<sup>+</sup> in females (magenta and light green in Columns G and H) suggest that these mutant βPS proteins can result in dominant effects in the presence of wild type βPS proteins. This is most prominent in *mys*<sup>b40</sup> and *mys*<sup>b55</sup>.

That heterozygosity for the *rhea*<sup>2</sup> allele has no effect on lethality in the absence of a *mys* mutant allele is shown in the wild type, *mys*<sup>+</sup>, crosses (end of table, Columns C and D).
