# Supplementary material
Source: PubMed Central journal article supplement (PMC3162457)
Supplement: supp_M111.254797_TableS3.pdf [file supp_M111.254797_TableS3.pdf]

Supplemental Table S3

| Table S3. TWOW-1 Binding Arranged by Amino Acid Position of Mutation |                      |              |               |                         |        |       |                 |         |           |      |                   |         |                   |        |      |                             |        |      |                |      |
|----------------------------------------------------------------------|----------------------|--------------|---------------|-------------------------|--------|-------|-----------------|---------|-----------|------|-------------------|---------|-------------------|--------|------|-----------------------------|--------|------|----------------|------|
| A                                                                    | B                    | C            | D             | E                       | F      | G     | H               | I       | J         | K    | L                 | M       | N                 | O      |      |                             |        |      |                |      |
| mys allele                                                           | $\beta$ PS AA Change | $\beta$ 3 AA | Domain        | Relative TWOW-1 Binding | Median | S.E.  | Relative TWOW-1 | Z score | WT vs Mut | p=   | Relative noMn/wMn | Z score | Relative noMn/wMn | Median | S.E. | Relative PS2 Integrin Level | Median | S.E. | Int. with rhea | refs |
| b41                                                                  | C40Y                 | C5           | PSI           | 1.90                    | 0.03   | 8.7   | 0.000           | 12.2    | 2.80      | 0.12 | 0.48              | 0.04    | b41               |        |      |                             |        |      |                |      |
| b33                                                                  | I50F                 | L17          | PSI           | 0.88                    | 0.13   | -2.7  | 0.149           | 0.7     | 1.29      | 0.10 | 0.63              | 0.08    | b33               |        |      |                             |        |      |                |      |
| b3                                                                   | C58S                 | C26          | PSI           | 1.72                    | 0.52   | 6.7   | 0.000           | 3.6     | 1.66      | 0.18 | 0.30              | 0.05    | b3                |        |      |                             |        |      |                |      |
| b68                                                                  | C58Y                 | C26          | PSI           | 1.82                    | 0.11   | 7.9   | 0.000           | 10.1    | 2.52      | 0.08 | 0.44              | 0.04    | b68               |        |      |                             |        |      |                |      |
| G4                                                                   | S196F                | S123         | MIDAS         | 0.00                    | 0.01   | -12.6 | 0.000           | -9.1    | 0.00      | 0.09 | 0.83              | 0.08    | G4                | 1,2    |      |                             |        |      |                |      |
| b67                                                                  | D200N                | D127         | ADMIDAS       | 2.15                    | 0.11   | 11.6  | 0.000           | 1.5     | 1.39      | 0.04 | 0.25              | 0.06    | b67               | 1,3-8  |      |                             |        |      |                |      |
| b38                                                                  | L224F                | I151         | ADMIDAS       | 1.73                    | 0.33   | 6.9   | 0.000           | 4.5     | 1.79      | 0.40 | 0.69              | 0.08    | b38               |        |      |                             |        |      |                |      |
| b26                                                                  | G227S                | G154         | SyMBS         | 0.35                    | 0.11   | -8.6  | 0.000           | -6.4    | 0.35      | 0.14 | 0.34              | 0.04    | b26               |        |      |                             |        |      |                |      |
| b20                                                                  | P242L                | P170         | $\beta$ -I    | 1.02                    | 0.06   | -1.2  | 0.295           | -2.3    | 0.89      | 0.07 | 0.56              | 0.07    | b20               |        |      |                             |        |      |                |      |
| b21                                                                  | L264F                | L196         | ADMIDAS       | 1.84                    | 0.30   | 8.1   | 0.000           | 6.2     | 2.01      | 0.54 | 0.32              | 0.03    | b21               | 9,10   |      |                             |        |      |                |      |
| b69                                                                  | S272+SVRQ            | N204+        | MIDAS/SyMBS   | 0.28                    | 0.15   | -9.5  | 0.000           | -5.7    | 0.44      | 0.20 | 0.29              | 0.04    | b69               |        |      |                             |        |      |                |      |
| b50                                                                  | S272+Q               | N204+        | MIDAS/SyMBS   | 1.65                    | 0.06   | 5.9   | 0.000           | 4.2     | 1.75      | 0.13 | 0.53              | 0.05    | b50               |        |      |                             |        |      |                |      |
| b13                                                                  | E274V                | E206         | MIDAS/SyMBS   | 0.29                    | 0.03   | -9.4  | 0.000           | -6.0    | 0.40      | 0.09 | 0.36              | 0.06    | b13               | 11     |      |                             |        |      |                |      |
| b47                                                                  | A293T                | A225         | MIDAS/SyMBS   | 0.20                    | 0.24   | -10.4 | 0.000           | -6.2    | 0.38      | 0.38 | 0.09              | 0.00    | b47               |        |      |                             |        |      |                |      |
| b30                                                                  | I298F                | T230         | $\beta$ -I    | 1.56                    | 0.10   | 4.9   | 0.001           | 0.4     | 1.25      | 0.09 | 0.24              | 0.03    | b30               |        |      |                             |        |      |                |      |
| b65                                                                  | A310T                | A242         | $\beta$ -I    | 0.98                    | 0.22   | -1.6  | 0.610           | 2.8     | 1.56      | 0.28 | 0.53              | 0.13    | b65               |        |      |                             |        |      |                |      |
| b45                                                                  | R312Q                | H244         | ADMIDAS       | 1.57                    | 0.19   | 5.0   | 0.000           | 3.2     | 1.62      | 0.27 | 0.29              | 0.09    | b45               |        |      |                             |        |      |                |      |
| b25                                                                  | S317L                | T249         | ADMIDAS       | 1.91                    | 0.12   | 8.8   | 0.000           | 7.8     | 2.22      | 0.09 | 0.49              | 0.07    | b25               |        |      |                             |        |      |                |      |
| b48                                                                  | A325T                | A257         | $\beta$ -I    | 1.04                    | 0.15   | -0.9  | 0.432           | -0.5    | 1.13      | 0.09 | 0.72              | 0.08    | b48               |        |      |                             |        |      |                |      |
| b66                                                                  | P336S                | P268         | $\beta$ -I    | 0.92                    | 0.10   | -2.3  | 0.180           | -1.2    | 1.03      | 0.06 | 0.63              | 0.09    | b66               |        |      |                             |        |      |                |      |
| b57                                                                  | G339S                | G271         | $\beta$ -I    | 1.28                    | 0.14   | 1.8   | 0.106           | -1.3    | 0.81      | 0.01 | 0.33              | 0.05    | b57               | 12,13  |      |                             |        |      |                |      |
| b49                                                                  | H342Y                | H274         | $\beta$ -I    | 1.45                    | 0.10   | 3.6   | 0.003           | 1.1     | 1.34      | 0.11 | 0.54              | 0.04    | b49               |        |      |                             |        |      |                |      |
| b42                                                                  | G347S                | N279         | $\beta$ -I    | 1.09                    | 0.15   | -0.3  | 0.831           | 1.0     | 1.33      | 0.18 | 0.45              | 0.02    | b42               |        |      |                             |        |      |                |      |
| ts2                                                                  | G347D                | N279         | $\beta$ -I    | 1.10                    | 0.11   | -0.2  | 0.595           | 1.4     | 1.38      | 0.12 | 0.44              | 0.05    | ts2               |        |      |                             |        |      |                |      |
| b44                                                                  | I375F                | I307         | ADMIDAS       | 1.44                    | 0.09   | 3.6   | 0.001           | 3.2     | 1.61      | 0.13 | 0.38              | 0.12    | b44               |        |      |                             |        |      |                |      |
| b53                                                                  | E387V                | N319         | $\beta$ -I    | 1.05                    | 0.08   | -0.8  | 0.205           | -2.1    | 0.91      | 0.10 | 0.40              | 0.05    | b53               |        |      |                             |        |      |                |      |
| b56                                                                  | G395S                | G327         | ADMIDAS       | 1.81                    | 0.11   | 7.7   | 0.000           | 5.4     | 1.90      | 0.06 | 0.50              | 0.08    | b56               |        |      |                             |        |      |                |      |
| b7                                                                   | D404N                | D336         | $\beta$ -I    | 1.26                    | 0.15   | 1.5   | 0.586           | 0.4     | 1.25      | 0.21 | 0.61              | 0.08    | b7                |        |      |                             |        |      |                |      |
| b23                                                                  | N407Y                | N339         | ADMIDAS       | 3.61                    | 0.24   | 28.0  | 0.000           | 14.6    | 3.11      | 0.21 | 0.24              | 0.03    | b23               | 12,13  |      |                             |        |      |                |      |
| b58                                                                  | V409D                | L341         | ADMIDAS       | 2.07                    | 0.14   | 10.6  | 0.000           | 9.3     | 2.41      | 0.17 | 0.30              | 0.02    | b58               |        |      |                             |        |      |                |      |
| b27                                                                  | V423E                | V355         | Hybrid        | 2.21                    | 0.16   | 12.3  | 0.000           | 7.0     | 2.11      | 0.24 | 0.77              | 0.06    | b27               |        |      |                             |        |      |                |      |
| b37                                                                  | C441Y                | C374         | Hybrid        | 1.81                    | 0.24   | 7.8   | 0.000           | -1.4    | 0.97      | 0.14 | 0.23              | 0.06    | b37               | 14     |      |                             |        |      |                |      |
| b63                                                                  | G531D                | G458         | I-EGF1        | 1.53                    | 0.08   | 4.6   | 0.001           | 2.0     | 1.46      | 0.10 | 0.39              | 0.06    | b63               | 15     |      |                             |        |      |                |      |
| b31                                                                  | G541S                | G468         | I-EGF1        | 1.76                    | 0.10   | 7.2   | 0.000           | 8.1     | 2.25      | 0.11 | 1.03              | 0.07    | b31               |        |      |                             |        |      |                |      |
| b64                                                                  | C544Y                | C471         | I-EGF1        | 2.40                    | 0.26   | 14.4  | 0.000           | 9.1     | 2.38      | 0.29 | 0.48              | 0.06    | b64               | 16     |      |                             |        |      |                |      |
| b55                                                                  | R587Q                | S511         | I-EGF2        | 1.58                    | 0.10   | 5.2   | 0.000           | 5.9     | 1.96      | 0.10 | 0.91              | 0.08    | b55               |        |      |                             |        |      |                |      |
| b46                                                                  | G596S                | G518         | I-EGF2        | 1.34                    | 0.08   | 2.4   | 0.001           | 0.7     | 1.29      | 0.09 | 0.55              | 0.09    | b46               |        |      |                             |        |      |                |      |
| b52                                                                  | G596R                | G518         | I-EGF2        | 1.92                    | 0.24   | 9.0   | 0.000           | 6.8     | 2.09      | 0.38 | 0.36              | 0.04    | b52               |        |      |                             |        |      |                |      |
| b24                                                                  | E600K                | E522         | I-EGF2-3      | 1.21                    | 0.1    | 1.0   | 0.102           | -0.4    | 1.14      | 0.06 | 0.61              | 0.08    | b24               |        |      |                             |        |      |                |      |
| b51                                                                  | E607K                | V529         | I-EGF3        | 3.51                    | 0.17   | 26.8  | 0.000           | 22.3    | 4.12      | 0.59 | 0.35              | 0.04    | b51               |        |      |                             |        |      |                |      |
| XN101                                                                | C629S                | C549         | I-EGF3        | 1.94                    | 0.46   | 9.1   | 0.000           | 6.3     | 2.02      | 0.50 | 0.05              | 0.00    | XN101             | 16,17  |      |                             |        |      |                |      |
| b22                                                                  | R676C                | G592         | I-EGF4        | 1.65                    | 0.12   | 5.9   | 0.000           | 4.2     | 1.74      | 0.14 | 0.34              | 0.03    | b22               |        |      |                             |        |      |                |      |
| b39                                                                  | G679D                | G595         | I-EGF4        | 1.23                    | 0.08   | 1.2   | 0.311           | 1.1     | 1.33      | 0.15 | 1.03              | 0.27    | b39               |        |      |                             |        |      |                |      |
| b4                                                                   | C701Y                | C617         | $\beta$ -TD   | 1.11                    | 0.04   | -0.1  | 0.634           | -0.3    | 1.16      | 0.04 | 0.70              | 0.07    | b4                |        |      |                             |        |      |                |      |
| b34                                                                  | G707S                | G623         | $\beta$ -TD   | 1.12                    | 0.07   | 0.0   | 0.451           | -0.2    | 1.17      | 0.07 | 0.96              | 0.07    | b34               |        |      |                             |        |      |                |      |
| b29                                                                  | F743I                | Y657         | $\beta$ -TD   | 2.00                    | 0.23   | 9.9   | 0.000           | 4.7     | 1.81      | 0.23 | 0.57              | 0.03    | b29               |        |      |                             |        |      |                |      |
| b32                                                                  | V763I                | S677         | $\beta$ -TD   | 1.21                    | 0.11   | 0.9   | 0.962           | 2.1     | 1.46      | 0.10 | 0.51              | 0.06    | b32               |        |      |                             |        |      |                |      |
| b40                                                                  | V775D                | P691         | $\beta$ -TD   | 1.51                    | 0.08   | 4.4   | 0.001           | -0.2    | 1.16      | 0.09 | 0.56              | 0.08    | b40               |        |      |                             |        |      |                |      |
| b1                                                                   | G792D                | G708         | Transmembrane | 1.44                    | 0.07   | 3.5   | 0.001           | -0.9    | 1.08      | 0.04 | 0.50              | 0.06    | b1                | 18-20  |      |                             |        |      |                |      |
| b70                                                                  | S836T<br>P841T       | S752<br>I757 | Cytoplasmic   | 1.02                    | 0.14   | -1.1  | 0.390           | 0.3     | 1.24      | 0.11 | 0.61              | 0.23    | b70               | 21-27  |      |                             |        |      |                |      |
| G1                                                                   | delT825>             | delT74       | Cytoplasmic   | 0.96                    | 0.12   | -1.9  | 0.503           | 1.46    | 1.39      | 0.07 | 0.68              | 0.10    | G1                |        |      |                             |        |      |                |      |

Table S3. Distribution, based on position, of TWOW-1 binding of mutant  $\beta$ PS integrins expressed together with  $\alpha$ PS2C in stably transformed cell lines. Data and shading is the same as in Table S2 but mutants have been sorted according to their position (Column B) in the  $\beta$ PS integrin subunit. As in Table S2, allele identification (Column A) is shaded according to TWOW-1 binding ability (Column G); red, z scores less than -10; dark pink, z scores between -5 and -10; no fill, z scores between -2.9 and 2.4; light green, z scores between 2.4 and 5; dark green z scores between 5 and 10; blue, z scores greater than 10. Columns are the same as in Table S2 except that Column has been added containing references for mutations in other  $\beta$  integrin subunits at the homologous residue (see paper for references).
